# Supplementary material for: Structural and Oxidative Properties of Manganese Incorporated Mesostructure Silica for Methane Oxidation
Source: Hindawi journal article supplement (doi:10.1155/2019/6024876), 2019-01-02
Supplement: f1 [file 6024876.f1.docx]

**Structural and oxidative properties of manganese incorporated mesostructure silica for methane oxidation**

Rihem Dardouri, Anis Gannouni, Mongia Saïd Zina


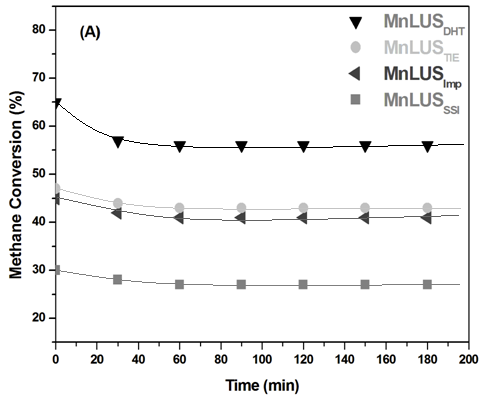


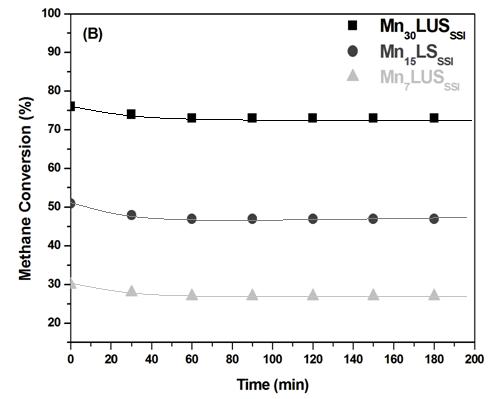


Figure S1: Methane conversion as function of time of (A) MnLUS (7wt. %) MnLUSDHT, MnLUSTIE, MnLUSImp and MnLUSSSI (B) Mn7LUSSSI, Mn15LUSSSI and Mn30LUSSSI.

**Graphical Abstract**

**
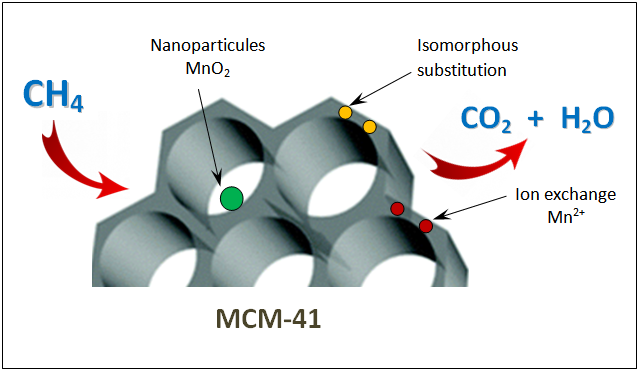
**
